# Supplementary material for: Capacity models for timber under compression perpendicular to grain with screw reinforcement
Source: Springer Nature journal article supplement (doi:10.1007/s00107-022-01918-z), 2023-01-11
Supplement: MOESM1 [file 23913506]

## Sheet: data
Ref	Label	Case	fc90k	fc90m	rok	L	W	H	d	lr	n	n0	d1	a1	a3c	le	fym	bc	lc	F1%def	kc90	kw	kmat	kp	fwk	Fwk	Nplk	Nkik	lk	k	kc	Fck	Min(Fck,Fwk)	lef1	lef2	A1	A2	Exp. FM	Th. FM
Karlsruhe	A_7_2	H	2.5	3	435		100	540	7.5	180	2	2	4.875	37.5	30	0	1033	100	80	77.5	1	1	1	1.1	5.35682	22.7076	19.2717	25.2568	0.873515	1.04653	0.616188	14.0125	14.0125	110	247.5	61.0249	74.25	/	A1
	A 8 2	H	2.5	3	435		100	540	8	340	2	2	5.2	40	32	0	1033	100	80	92	1	1	1	1.1	5.24394	44.7874	21.9269	29.0429	0.868897	1.04137	0.619055	16.0172	16.0172	110	412	65.0345	123.6	/	A1
	A 10 2	H	2.5	3	435		100	540	10	200	2	2	6.5	50	40	0	1033	100	80	104	1	1	1	1.1	4.87166	30.594	34.2607	47.2452	0.851568	1.02222	0.629845	25.4631	25.4631	110	290	83.9263	87	/	A1		Input
	A 7 4	H	2.5	3	435		100	540	7.5	180	4	2	4.875	37.5	30	0	1033	100	120	126	1	1	1	1.1	5.35682	22.7076	19.2717	25.2568	0.873515	1.04653	0.616188	14.0125	14.0125	150	247.5	101.05	74.25	/	A2		Output
	A 10 4	H	2.5	3	435		100	540	10	200	4	2	6.5	50	40	0	1033	100	120	133	1	1	1	1.1	4.87166	30.594	34.2607	47.2452	0.851568	1.02222	0.629845	25.4631	25.4631	150	290	146.853	87	/	A2
	A 6 6	H	2.5	3	435		120	540	6.5	115	6	3	4.225	32.5	26	0	1033	120	90	132	1	1	1	1.1	5.61585	13.1813	14.4752	18.5597	0.883133	1.05733	0.61023	10.4232	10.4232	120	206	105.739	74.16	/	A2
	D 7 2	C	2.5	3	435		100	540	7.5	180	2	2	4.875	37.5	30	0	1033	100	80	96.1	1	1	1	1.1	5.35682	22.7076	19.2717	25.2568	0.873515	1.04653	0.616188	14.0125	14.0125	110	247.5	61.0249	74.25	A2	A1
	D 8 2	C	2.5	3	435		100	540	8	340	2	2	5.2	40	32	0	1033	100	80	98	1	1	1	1.1	5.24394	44.7874	21.9269	29.0429	0.868897	1.04137	0.619055	16.0172	16.0172	110	412	65.0345	123.6	/	A1
	D 10 2	C	2.5	3	435		100	540	10	200	2	2	6.5	50	40	0	1033	100	80	104	1	1	1	1.1	4.87166	30.594	34.2607	47.2452	0.851568	1.02222	0.629845	25.4631	25.4631	110	290	83.9263	87	/	A1
	D 4	C	2.5	3	435		100	540	7.5	180	4	2	4.875	37.5	30	0	1033	100	120	127	1	1	1	1.1	5.35682	22.7076	19.2717	25.2568	0.873515	1.04653	0.616188	14.0125	14.0125	150	247.5	101.05	74.25	/	A2
	D 4	C	2.5	3	435		100	540	8	340	4	2	5.2	40	32	0	1033	100	120	169	1	1	1	1.1	5.24394	44.7874	21.9269	29.0429	0.868897	1.04137	0.619055	16.0172	16.0172	150	412	109.069	123.6	/	A1
	D 10 4	C	2.5	3	435		100	540	10	200	4	2	6.5	50	40	0	1033	100	120	173	1	1	1	1.1	4.87166	30.594	34.2607	47.2452	0.851568	1.02222	0.629845	25.4631	25.4631	150	290	146.853	87	/	A2
	D 7 6	C	2.5	3	435		120	220	7.5	180	6	3	4.875	37.5	30	0	1033	120	90	195	1	1	1	1.1	5.35682	22.7076	19.2717	25.2568	0.873515	1.04653	0.616188	14.0125	14.0125	120	285	127.275	102.6	/	A2
	D 8a 6	C	2.5	3	435		120	300	8	260	6	3	5.2	40	32	0	1033	120	90	228	1	1	1	1.1	5.24394	34.2492	21.9269	29.0429	0.868897	1.04137	0.619055	16.0172	16.0172	120	372	139.303	133.92	/	A2
	D 8b 6	C	2.5	3	435		120	480	8	400	6	3	5.2	40	32	0	1033	120	90	242	1	1	1	1.1	5.24394	52.6911	21.9269	29.0429	0.868897	1.04137	0.619055	16.0172	16.0172	120	512	139.303	184.32	/	A1
Nilsson	4 WT-T 8.2x220	B	2.5	3	390	500	90	315	8.2	190	4	2	5.33	75	37.5	0	1033	90	150	141	1.5	1	1	1.1	4.61266	22.5657	23.0369	29.0128	0.891081	1.06633	0.605322	16.4548	16.4548	180	302.5	138.719	81.675	/	A2
	6 WT-T 8.2x220	B	2.5	3	390	500	90	315	8.2	190	6	3	5.33	50	25	0	1033	90	150	159	1.5	1	1	1.1	4.61266	22.5657	23.0369	29.0128	0.891081	1.06633	0.605322	16.4548	16.4548	180	315	171.629	85.05	/	A2
	8 WT-T`8.2x220	B	2.5	3	390	500	90	315	8.2	190	8	3	5.33	25	25	0	1033	90	150	140	1.5	1	1	1.1	4.61266	22.5657	23.0369	29.0128	0.891081	1.06633	0.605322	16.4548	16.4548	180	265	204.538	71.55	/	A2
Reichegger	WT-T 6.5X130	B	2.5	3	390	400	120	200	6.5	80	4	2	4.225	40	40	500	1033	120	90	101.5	1.5	1	1	1.1	4.98022	8.13171	14.4752	17.5735	0.907574	1.0852	0.595183	10.1661	8.13171	150	160	113.527	57.6	A1	A2
	WT-T 6.5X160	B	2.5	3	390	400	120	200	6.5	130	4	2	4.225	40	40	500	1033	120	90	123.7	1.5	1	1	1.1	4.98022	13.214	14.4752	17.5735	0.907574	1.0852	0.595183	10.1661	10.1661	150	210	121.665	75.6	A1	A2
	WT-T 8.2X160	B	2.5	3	390	400	120	200	8.2	130	4	2	5.33	40	40	500	1033	120	90	136.3	1.5	1	1	1.1	4.61266	15.4397	23.0369	29.0128	0.891081	1.06633	0.605322	16.4548	15.4397	150	210	142.759	75.6	A1	A2
	WT-T 8.2X220	B	2.5	3	390	600	120	400	8.2	190	4	2	5.33	40	40	500	1033	120	120	173.1	1.5	1	1	1.1	4.61266	22.5657	23.0369	29.0128	0.891081	1.06633	0.605322	16.4548	16.4548	180	270	163.019	97.2	A1	A2
	SPAX-S 8X200	B	2.5	3	390	600	120	400	8	200	4	2	5.2	40	40	500	1033	120	120	175.8	1.5	1	1	1.1	4.6504	23.3636	21.9269	27.4997	0.892944	1.06845	0.604173	15.6322	15.6322	180	280	159.729	100.8	A1	A2
Tomasi	Pe_8.2_160_A	A	2.5	3	390	180	140	200	8.2	130	2	1	5.33	70	70	0	1033	140	180	96	1.5	1	1	1.1	4.61266	15.4397	23.0369	29.0128	0.891081	1.06633	0.605322	16.4548	15.4397	210	200	163.179	84	A2	A2
	Pe_7.0_160_B	B	2.5	3	390	800	140	225	7	160	2	1	4.55	70	400	310	1033	140	180	172	1.5	1	1	1.1	4.8599	17.0913	16.7878	20.608	0.902565	1.07944	0.598255	11.8512	11.8512	240	320	174.902	134.4	A1	A2
	Pa_7.0_160_B	B	2.5	3	390	800	140	225	7	160	2	2	4.55	70	365	310	1033	140	180	172	1.5	1	1	1.1	4.8599	17.0913	16.7878	20.608	0.902565	1.07944	0.598255	11.8512	11.8512	240	390	174.902	163.8	A1	A2
	Pe_8.2_160_B	B	2.5	3	390	800	140	225	8.2	130	2	1	5.33	70	365	310	1033	140	180	174	1.5	1	1	1.1	4.61266	15.4397	23.0369	29.0128	0.891081	1.06633	0.605322	16.4548	15.4397	240	260	182.079	109.2	A1	A2
	Pe_8.0_180_B	B	2.5	3	390	800	140	225	8	180	2	1	5.2	70	400	310	1033	140	180	196	1.5	1	1	1.1	4.6504	21.0273	21.9269	27.4997	0.892944	1.06845	0.604173	15.6322	15.6322	240	360	182.464	151.2	A1	A2
	Pe_8.0_200_B	B	2.5	3	390	800	140	225	8	200	2	1	5.2	70	400	310	1033	140	180	205	1.5	1	1	1.1	4.6504	23.3636	21.9269	27.4997	0.892944	1.06845	0.604173	15.6322	15.6322	240	400	182.464	168	A1	A2
	S_7.0_160_B	B	2.5	3	390	800	140	225	7	160	4	2	4.55	70	365	310	1033	140	180	210	1.5	1	1	1.1	4.8599	17.0913	16.7878	20.608	0.902565	1.07944	0.598255	11.8512	11.8512	240	390	198.605	163.8	A1	A2
	S_8.2_160_B	B	2.5	3	390	800	140	225	8.2	130	4	2	5.33	70	365	310	1033	140	180	189	1.5	1	1	1.1	4.61266	15.4397	23.0369	29.0128	0.891081	1.06633	0.605322	16.4548	15.4397	240	330	212.959	138.6	A1	A2
	S_8.0_160_B	B	2.5	3	390	800	140	225	8	160	4	2	5.2	70	365	310	1033	140	180	194	1.5	1	1	1.1	4.6504	18.6909	21.9269	27.4997	0.892944	1.06845	0.604173	15.6322	15.6322	240	390	213.729	163.8	A1	A2
	S_8.0_180_B	B	2.5	3	390	800	140	225	8	180	4	2	5.2	70	365	310	1033	140	180	217	1.5	1	1	1.1	4.6504	21.0273	21.9269	27.4997	0.892944	1.06845	0.604173	15.6322	15.6322	240	430	213.729	180.6	A1	A2
	S_8.0_200_B	B	2.5	3	390	800	140	225	8	200	4	2	5.2	70	365	310	1033	140	180	217	1.5	1	1	1.1	4.6504	23.3636	21.9269	27.4997	0.892944	1.06845	0.604173	15.6322	15.6322	240	470	213.729	197.4	A1	A2
	S6_7.0_160_B	B	2.5	3	390	800	140	225	7	160	6	3	4.55	70	330	220	1033	140	360	311	1.5	1	1	1.1	4.8599	17.0913	16.7878	20.608	0.902565	1.07944	0.598255	11.8512	11.8512	420	460	335.707	193.2	A1	A2
	Pe_8.0_300_B	B	2.5	3	390	1200	140	540	8	300	2	1	5.2	70	600	510	1033	140	180	234	1.5	1	1	1.1	4.6504	35.0454	21.9269	27.4997	0.892944	1.06845	0.604173	15.6322	15.6322	240	600	182.464	252	A1	A1
	Pe_9.0_440_B	B	2.5	3	390	1200	140	540	9	440	2	1	5.85	70	550	460	1033	140	180	230	1.5	1	1	1.1	4.47311	55.6205	27.7512	35.5269	0.883816	1.0581	0.609808	19.969	19.969	240	880	191.138	369.6	A1	A1
	Pa_9.0_440_B	B	2.5	3	390	1200	140	540	9	440	2	2	5.85	70	515	460	1033	140	180	225	1.5	1	1	1.1	4.47311	55.6205	27.7512	35.5269	0.883816	1.0581	0.609808	19.969	19.969	240	950	191.138	399	A1	A1
	S_8.0_300_B	B	2.5	3	390	1200	140	540	8	300	4	2	5.2	70	565	510	1033	140	180	256	1.5	1	1	1.1	4.6504	35.0454	21.9269	27.4997	0.892944	1.06845	0.604173	15.6322	15.6322	240	670	213.729	281.4	A1	A1
	S_8.0_340_B	B	2.5	3	390	1200	140	540	8	340	4	2	5.2	70	600	510	1033	140	180	271	1.5	1	1	1.1	4.6504	39.7181	21.9269	27.4997	0.892944	1.06845	0.604173	15.6322	15.6322	240	750	213.729	315	A1	A1
	S_9.0_440_B	B	2.5	3	390	1200	140	540	9	440	4	2	5.85	70	515	460	1033	140	180	292	1.5	1	1	1.1	4.47311	55.6205	27.7512	35.5269	0.883816	1.0581	0.609808	19.969	19.969	240	950	231.076	399	A1	A1
	S6_9.0_440_B	B	2.5	3	390	1200	140	540	9	440	6	3	5.85	70	530	420	1033	140	360	455	1.5	1	1	1.1	4.47311	55.6205	27.7512	35.5269	0.883816	1.0581	0.609808	19.969	19.969	420	1020	384.414	428.4	A1	A1
	Pe_7.0_160_C	C	2.5	3	390	800	140	225	7	160	2	1	4.55	70	365	310	1033	140	180	173	1	1	1	1.1	4.8599	17.0913	16.7878	20.608	0.902565	1.07944	0.598255	11.8512	11.8512	240	320	124.502	134.4	A1	A1
	Pe_8.2_160_C	C	2.5	3	390	800	140	225	8.2	130	2	1	5.33	70	365	310	1033	140	180	169	1	1	1	1.1	4.61266	15.4397	23.0369	29.0128	0.891081	1.06633	0.605322	16.4548	15.4397	240	260	131.679	109.2	A1	A2
	S_7.0_160_C	C	2.5	3	390	800	140	225	7	160	2	2	4.55	70	365	310	1033	140	180	192	1	1	1	1.1	4.8599	17.0913	16.7878	20.608	0.902565	1.07944	0.598255	11.8512	11.8512	240	390	124.502	163.8	A1	A1
	S_8.2_160_C	C	2.5	3	390	800	140	225	8.2	130	2	2	5.33	70	365	310	1033	140	180	183	1	1	1	1.1	4.61266	15.4397	23.0369	29.0128	0.891081	1.06633	0.605322	16.4548	15.4397	240	330	131.679	138.6	A1	A1
	S_8.0_160_C	C	2.5	3	390	800	140	225	8	160	2	2	5.2	70	515	460	1033	140	180	191	1	1	1	1.1	4.6504	18.6909	21.9269	27.4997	0.892944	1.06845	0.604173	15.6322	15.6322	240	390	132.064	163.8	A1	A1
	Pe_9.0_440_C	C	2.5	3	390	1200	140	540	9	440	4	2	5.85	70	515	460	1033	140	180	229	1	1	1	1.1	4.47311	55.6205	27.7512	35.5269	0.883816	1.0581	0.609808	19.969	19.969	240	950	180.676	399	A1	A1
	S_9.0_440_C	C	2.5	3	390	1200	140	540	9	440	2	2	5.85	70	515	460	1033	140	180	235	1	1	1	1.1	4.47311	55.6205	27.7512	35.5269	0.883816	1.0581	0.609808	19.969	19.969	240	950	140.738	399	A1	A1
